# Supplementary material for: Modulating the structural topologies and magnetic relaxation behaviour of the Mn–Dy compounds by using different auxiliary organic ligands
Source: Royal Society of Chemistry journal article supplement (doi:10.1039/d0nj03838e), 2020-01-01
Supplement: d0nj03838e1.pdf [file d0nj03838e1.pdf]

## Electronic supplementary information (ESI)

*New Journal of Chemistry*

### **Modulating the structural topologies and magnetic relaxation behaviour of the Mn-Dy compounds through employing different auxiliary organic ligands**

Hui-Sheng Wang,<sup>\*a</sup> Yong Chen,<sup>a</sup> Zhao-Bo Hu,<sup>b</sup> Ke Zhang,<sup>a</sup> Zaichao Zhang,<sup>c</sup> You Song<sup>\*b</sup> and Zhi-Quan Pan<sup>a</sup>

<sup>a</sup> School of Chemistry and Environmental Engineering, Key Laboratory of Green Chemical Process of Ministry of Education, Key Laboratory of Novel Reactor and Green Chemical Technology of Hubei Province, Wuhan Institute of Technology, Wuhan 430074, P. R. China.

<sup>b</sup> State Key Laboratory of Coordination Chemistry, School of Chemistry and Chemical Engineering, Collaborative Innovation Center of Advanced Microstructures, Nanjing University, Nanjing 210046, P. R. China.

<sup>c</sup> Jiangsu Key Laboratory for the Chemistry of Low-dimensional Materials, College of Chemistry and Chemical Engineering, Huaiyin Normal University, Huai'an 223300, P. R. China.

Corresponding author, E-mail: wangch198201@163.com (H.-S.W.);  
yousong@nju.edu.cn (Y. S.)

**Table S1.** Crystal data and structure refinement parameters for **1** and **2**.

| Compounds                                                          | <b>1</b>                                                                                         | <b>2</b>                                                                                        |
|--------------------------------------------------------------------|--------------------------------------------------------------------------------------------------|-------------------------------------------------------------------------------------------------|
| Formula                                                            | C <sub>62</sub> H <sub>61</sub> Cl <sub>2</sub> DyMn <sub>4</sub> N <sub>8</sub> O <sub>17</sub> | C <sub>72</sub> H <sub>86</sub> Mn <sub>4</sub> Dy <sub>2</sub> N <sub>14</sub> O <sub>27</sub> |
| Formula weight                                                     | 1643.34                                                                                          | 2124.30                                                                                         |
| Crystal colour                                                     | brown                                                                                            | light brown                                                                                     |
| Crystal size/mm                                                    | 0.32 × 0.08 × 0.07                                                                               | 0.13 × 0.11 × 0.07                                                                              |
| Crystal system                                                     | monoclinic                                                                                       | monoclinic                                                                                      |
| Space group                                                        | <i>C2/c</i>                                                                                      | <i>C2/c</i>                                                                                     |
| <i>a</i> (Å)                                                       | 25.1051(11)                                                                                      | 18.7726(14)                                                                                     |
| <i>b</i> (Å)                                                       | 26.7821(9)                                                                                       | 11.0470(7)                                                                                      |
| <i>c</i> (Å)                                                       | 22.7889(10)                                                                                      | 19.4765(13)                                                                                     |
| $\alpha$ (°)                                                       | 90                                                                                               | 90                                                                                              |
| $\beta$ (°)                                                        | 100.298(2)                                                                                       | 97.954(2)                                                                                       |
| $\gamma$ (°)                                                       | 90                                                                                               | 90                                                                                              |
| Unit cell volume (Å <sup>3</sup> )                                 | 15075.7(11)                                                                                      | 4000.2(5)                                                                                       |
| Temperature (K)                                                    | 173(2)                                                                                           | 173(2)                                                                                          |
| <i>Z</i>                                                           | 8                                                                                                | 2                                                                                               |
| Wavelength (Å)                                                     | 0.71073                                                                                          | 0.71073                                                                                         |
| $\mu$ (Mo K $\alpha$ ) [mm <sup>-1</sup> ]                         | 1.767                                                                                            | 2.546                                                                                           |
| <i>D</i> <sub>c</sub> (g cm <sup>-3</sup> )                        | 1.448                                                                                            | 1.764                                                                                           |
| $\theta$ range (°)                                                 | 3.0674-25.3726                                                                                   | 2.9019-25.2760                                                                                  |
| Index ranges                                                       | -29 ≤ <i>h</i> ≤ 26<br>-31 ≤ <i>k</i> ≤ 31<br>-27 ≤ <i>l</i> ≤ 27                                | -22 ≤ <i>h</i> ≤ 22<br>-13 ≤ <i>k</i> ≤ 13<br>-23 ≤ <i>l</i> ≤ 21                               |
| <i>F</i> (000)                                                     | 6600                                                                                             | 2128                                                                                            |
| Reflections collected                                              | 75457                                                                                            | 12268                                                                                           |
| Unique reflections [ <i>R</i> <sub>int</sub> ]                     | 13053                                                                                            | 3512                                                                                            |
| Reflections with <i>I</i> > 2σ( <i>I</i> )                         | 9604                                                                                             | 2836                                                                                            |
| Final <i>R</i> indices ( <i>I</i> > 2σ( <i>I</i> )) <sup>a,b</sup> | <i>R</i> <sub>1</sub> = 0.0952, <i>wR</i> <sub>2</sub> = 0.2016                                  | <i>R</i> <sub>1</sub> = 0.0390, <i>wR</i> <sub>2</sub> = 0.0719                                 |
| Final <i>R</i> indices (all data)                                  | <i>R</i> <sub>1</sub> = 0.01341, <i>wR</i> <sub>2</sub> = 0.2157                                 | <i>R</i> <sub>1</sub> = 0.0592, <i>wR</i> <sub>2</sub> = 0.0763                                 |
| <i>S</i> (all data)                                                | 1.096                                                                                            | 1.046                                                                                           |
| (Δρ) <sub>max,min</sub> /e Å <sup>-3</sup>                         | 3.449 and -3.550                                                                                 | 0.930 and -0.758                                                                                |

<sup>a</sup>*R*<sub>1</sub> = Σ(|*F*<sub>o</sub>| - |*F*<sub>c</sub>|)/Σ|*F*<sub>o</sub>|. <sup>b</sup>*wR*<sub>2</sub> = [Σ[w(*F*<sub>o</sub><sup>2</sup> - *F*<sub>c</sub><sup>2</sup>)<sup>2</sup>]/Σ[w(*F*<sub>o</sub><sup>2</sup>)<sup>2</sup>]]<sup>1/2</sup>, *w* = 1/[σ<sup>2</sup>(*F*<sub>o</sub><sup>2</sup>) + [(*ap*)<sup>2</sup> + *bp*], where *p* = [max(*F*<sub>o</sub><sup>2</sup>, 0) + 2*F*<sub>c</sub><sup>2</sup>]/3.

**Table S2.** Selected bond lengths (Å) and angles (°) for **1**.

| Selected bond lengths for <b>1</b> |          |            |           |             |           |
|------------------------------------|----------|------------|-----------|-------------|-----------|
| Cl1-Mn4                            | 2.667(4) | Dy1-O5     | 2.415(7)  | Mn3-O9      | 1.869(8)  |
| Cl1-Mn1                            | 2.687(4) | Mn1-O1     | 1.870(9)  | Mn3-O10     | 1.888(8)  |
| Cl2-Mn2                            | 2.686(4) | Mn1-O2     | 1.891(8)  | Mn3-O12     | 1.958(7)  |
| Cl2-Mn3                            | 2.642(4) | Mn1-O4     | 1.937(7)  | Mn3-N5      | 1.970(10) |
| Dy1-O10                            | 2.314(8) | Mn1-N1     | 1.981(10) | Mn3-N6      | 2.270(10) |
| Dy1-O15                            | 2.346(8) | Mn1-N2     | 2.298(11) | Mn4-O15     | 1.876(8)  |
| Dy1-O12                            | 2.348(8) | Mn2-O6     | 1.878(8)  | Mn4-O14     | 1.875(9)  |
| Dy1-O7                             | 2.357(8) | Mn2-O7     | 1.878(8)  | Mn4-O13     | 1.979(8)  |
| Dy1-O4                             | 2.365(8) | Mn2-O5     | 1.939(8)  | Mn4-N8      | 1.983(10) |
| Dy1-O2                             | 2.369(8) | Mn2-N4     | 1.966(10) | Mn4-N7      | 2.260(10) |
| Dy1-O13                            | 2.402(8) | Mn2-N3     | 2.307(11) |             |           |
| Selected bond angles for <b>1</b>  |          |            |           |             |           |
| O2-Dy1-O13                         | 82.2(3)  | O2-Mn1-O4  | 86.6(4)   | O10-Mn3-O12 | 84.5(3)   |
| O15-Dy1-O4                         | 85.5(3)  | O4-Mn1-N1  | 167.7(4)  | O10-Mn3-N5  | 83.3(4)   |
| O12-Dy1-O4                         | 172.9(3) | N1-Mn1-N2  | 96.0(4)   | O9-Mn3-O12  | 99.8(3)   |
| O15-Dy1-O12                        | 91.9(3)  | O1-Mn1-Cl1 | 94.3(3)   | O12-Mn3-N5  | 165.9(4)  |
| O10-Dy1-O7                         | 110.1(3) | N2-Mn1-Cl1 | 171.0(3)  | N5-Mn3-N6   | 97.4(4)   |
| O15-Dy1-O7                         | 72.3(3)  | O6-Mn2-O7  | 175.2(4)  | O9-Mn3-Cl2  | 89.7(3)   |
| O4-Dy1-O5                          | 56.9(2)  | O6-Mn2-O5  | 99.2(4)   | N6-Mn3-Cl2  | 169.9(3)  |
| O2-Dy1-O5                          | 95.2(3)  | O5-Mn2-N4  | 168.3(4)  | O15-Mn4-O14 | 172.9(4)  |
| O7-Dy1-O2                          | 158.3(3) | O6-Mn2-N4  | 92.4(4)   | O14-Mn4-O13 | 102.5(4)  |
| O4-Dy1-O2                          | 67.4(3)  | N4-Mn2-N3  | 105.7(4)  | O13-Mn4-N8  | 166.5(4)  |
| O7-Dy1-O13                         | 117.9(3) | O6-Mn2-Cl2 | 91.3(3)   | N8-Mn4-N7   | 102.7(4)  |
| O1-Mn1-O2                          | 176.2(4) | N4-Mn2-Cl2 | 87.0(3)   | O15-Mn4-Cl1 | 85.2(3)   |
| O1-Mn1-O4                          | 96.8(4)  | O9-Mn3-O10 | 174.9(3)  | N7-Mn4-Cl1  | 168.3(3)  |

**Table S3.** Selected bond lengths (Å) and angles (°) for **2**.

| Selected bond lengths for <b>2</b> |          |                     |          |                     |          |
|------------------------------------|----------|---------------------|----------|---------------------|----------|
| Dy1-O5                             | 2.285(3) | Dy1-O5 <sup>a</sup> | 2.285(3) | Dy1-O4              | 2.339(3) |
| Dy1-O4 <sup>a</sup>                | 2.339(3) | Dy1-O2              | 2.351(3) | Dy1-O2 <sup>a</sup> | 2.351(3) |
| Dy1-N2                             | 2.574(4) | Dy1-N2 <sup>a</sup> | 2.574(4) | Mn1-O1              | 1.879(3) |
| Mn1-O4                             | 1.894(3) | Mn1-O2              | 1.896(3) | Mn1-N1              | 1.970(4) |
| Mn1-N3                             | 2.292(4) | Mn1-O3              | 2.310(3) |                     |          |

| Selected bond angles for <b>2</b> |            |                          |            |                          |            |
|-----------------------------------|------------|--------------------------|------------|--------------------------|------------|
| O5-Dy1-O5 <sup>a</sup>            | 87.06(19)  | O5-Dy1-O4                | 84.72(12)  | O5-Dy1-O4                | 143.05(12) |
| O5-Dy1-O4 <sup>a</sup>            | 84.72(12)  | O4-Dy1-O4 <sup>a</sup>   | 121.63(15) | O5- Dy1- O2              | 151.12(12) |
| O5- Dy1- O2 <sup>a</sup>          | 90.45(12)  | O4- Dy1- O2              | 80.10(11)  | O4- Dy1- O2 <sup>a</sup> | 65.02(10)  |
| O2- Dy1- O2 <sup>a</sup>          | 104.92(15) | O5- Dy1- N2              | 78.59(13)  | O5- Dy1- N2 <sup>a</sup> | 77.90(12)  |
| O4- Dy1- N2                       | 134.84(11) | O4- Dy1- N2 <sup>a</sup> | 64.47(11)  | O2- Dy1- N2              | 128.90(11) |
| O2- Dy1- N2 <sup>a</sup>          | 73.41(11)  | O5- Dy1- N2              | 77.89(12)  | O5- Dy1- N2 <sup>a</sup> | 78.59(13)  |
| O4- Dy1- N2                       | 64.47(11)  | O4- Dy1- N2              | 134.84(11) | O2- Dy1- N2              | 73.41(11)  |
| O2- Dy1- N2 <sup>a</sup>          | 128.90(11) | N2- Dy1- N2 <sup>a</sup> | 147.35(17) | O1- Mn1- O4              | 101.02(13) |
| O1- Mn1- O2                       | 175.48(13) | O4- Mn1- O2              | 83.35(13)  | O1- Mn1- N1              | 92.25(15)  |
| O4- Mn1- N1                       | 165.68(15) | O2- Mn1- N1              | 83.52(14)  | O1- Mn1- N3              | 87.60(16)  |
| O4- Mn1- N3                       | 94.20(15)  | O2- Mn1- N3              | 90.93(16)  | N1- Mn1- N3              | 91.71(16)  |
| O1- Mn1- O3                       | 89.22(13)  | O4- Mn1- O3              | 86.70(13)  | N1- Mn1- O3              | 88.12(14)  |

Symmetry code: a 0.5+x, -0.5-y, -0.5+z

**Table S4.** Bond valence sum (BVS) calculations for determining of the protonation levels of the O atoms in **1**

| Atoms in <b>1</b> | BVS values of <b>1</b> | Atoms in <b>1</b> | BVS values of in <b>1</b> |
|-------------------|------------------------|-------------------|---------------------------|
| O1                | 1.95                   | O2                | 1.99                      |
| O3                | 0.97                   | O4                | 2.01                      |
| O5                | 1.94                   | O6                | 1.88                      |
| O7                | 2.01                   | O8                | 0.87                      |
| O9                | 1.95                   | O10               | 2.11                      |
| O11               | 0.85                   | O12               | 1.96                      |
| O13               | 1.81                   | O14               | 1.88                      |
| O15               | 2.05                   | O16               | 0.94                      |

The values of BVS calculations for O atoms in the ~1.8–2.0, ~1.0–1.2, and ~0.2–0.4 ranges are indicative of non-, single- and double-protonation, respectively. Single protonated alkoxido-type O atoms on the organic ligands were labelled using red.

**Table S5.** Bond valence sum (BVS) calculations for determining of the protonation levels of the O atoms in **2**.

| Atoms in <b>2</b> | BVS values of <b>2</b> | Atoms in <b>2</b> | BVS values of in <b>2</b> |
|-------------------|------------------------|-------------------|---------------------------|
| O1                | 1.92                   | O2                | 2.02                      |
| O3                | 1.13                   | O4                | 2.11                      |
| O5                | 1.92                   | O6                | 1.45                      |

The values of BVS calculations for O atoms in the ~1.8–2.0, ~1.0–1.2, and ~0.2–0.4 ranges are indicative of non-, single- and double-protonation, respectively. Single protonated alkoxido-type O atoms on the organic ligands were labelled using red.

**Table S6.** Bond valence sum (BVS) calculations for determining of the oxidation states of the Mn atoms in **1**

| Mn atom in complex <b>1</b> | Mn(II) | Mn(III)     | Mn(IV) |
|-----------------------------|--------|-------------|--------|
| Mn (1)                      | 3.05   | <u>3.24</u> | 3.18   |
| Mn (2)                      | 3.52   | <u>3.27</u> | 3.22   |
| Mn (3)                      | 3.54   | <u>3.28</u> | 3.22   |
| Mn (4)                      | 3.49   | <u>3.23</u> | 3.19   |

The values labeled by underline indicated that they are close to the assigned oxidation state of Mn atoms. In **1**, the oxidation states of four Mn atoms are all +3.

**Table S7.** Bond valence sum (BVS) calculations for determining of the oxidation states of the Mn atoms in **2**.

| Mn atom in complex <b>2</b> | Mn(II) | Mn (III)    | Mn (IV) |
|-----------------------------|--------|-------------|---------|
| Mn(1)                       | 3.62   | <u>3.42</u> | 3.37    |

The values labeled by underline indicated that they are close to the assigned oxidation state of Mn atoms. In **2**, the oxidation state of Mn atom is +3.

**Table S8.** The possible geometries of nona-coordination metal centers and Deviation parameters from each ideal polyhedron for Dy of complex **1**.

| Point group | Geometry | Polyhedron                                     | Dy1    |
|-------------|----------|------------------------------------------------|--------|
| $D_{8h}$    | OP-8     | Octagon                                        | 31.809 |
| $C_{7v}$    | HPY-8    | Heptagonal pyramid                             | 24.231 |
| $D_{6h}$    | HBPY-8   | Hexagonal bipyramid                            | 8.857  |
| $O_h$       | CU-8     | Cube                                           | 2.654  |
| $D_{4d}$    | SAPR-8   | Square antiprism                               | 5.448  |
| $D_{2d}$    | TDD-8    | Triangular dodecahedron                        | 4.456  |
| $D_{2d}$    | JGBF-8   | Johnson - Gyrobifastigium (J26)                | 15.980 |
| $D_{3h}$    | JETBPY-8 | Johnson - Elongated triangular bipyramid (J14) | 22.204 |
| $C_{2v}$    | JBTP-8   | Johnson - Biaugmented trigonal prism (J50)     | 7.635  |

|          |         |                              |        |
|----------|---------|------------------------------|--------|
| $C_{2v}$ | BTPR-8  | Biaugmented trigonal prism   | 6.827  |
| $D_{2d}$ | JSD-8   | Snub disphenoid (J84)        | 9.299  |
| $T_d$    | TT-8    | Triakis tetrahedron          | 3.525  |
| $D_{3h}$ | ETBPY-8 | Elongated trigonal bipyramid | 19.937 |

**Table S9.** The possible geometries of oct-coordination metal centers and Deviation parameters from each ideal polyhedron for Dy of complex **2**.

| Point group | Geometry | Polyhedron                                   | Dy1     |
|-------------|----------|----------------------------------------------|---------|
| $D_{8h}$    | OP-8     | Octagon                                      | 31.114, |
| $C_{7v}$    | HPY-8    | Heptagonal pyramid                           | 23.918  |
| $D_{6h}$    | HBPY-8   | Hexagonal bipyramid                          | 15.780  |
| $O_h$       | CU-8     | Cube                                         | 13.347  |
| $D_{4d}$    | SAPR-8   | Square antiprism                             | 4.304   |
| $D_{2d}$    | TDD-8    | Triangular dodecahedron                      | 2.363   |
| $D_{2d}$    | JGBF-8   | Johnson-Gyrobifastigium (J26)                | 11.826  |
| $D_{3h}$    | JETBPY-8 | Johnson-Elongated triangular bipyramid (J14) | 24.272  |
| $C_{2v}$    | JBTP-8   | Johnson - Biaugmented trigonal prism (J50)   | 2.169   |
| $C_{2v}$    | BTPR-8   | Biaugmented trigonal prism                   | 2.375   |
| $D_{2d}$    | JSD-8    | Snub disphenoid (J84)                        | 3.057   |
| $T_d$       | TT-8     | Triakis tetrahedron                          | 13.612  |
| $D_{3h}$    | ETBPY-8  | Elongated trigonal bipyramid                 | 22.743  |

**Table S10.** The obtained parameters of  $\tau_0$  and  $U_{\text{eff}}$  for **1** by employing the equation  $\ln(\chi''/\chi') = \ln(\omega\tau_0) + U_{\text{eff}}/k_B T$ .

| Frequencies                    | $\tau_0$              | $U_{\text{eff}}$ | Frequencies           | $\tau_0$              | $U_{\text{eff}}$ |
|--------------------------------|-----------------------|------------------|-----------------------|-----------------------|------------------|
| 45 Hz                          | $7.89 \times 10^{-5}$ | 8.14 K           | 251 Hz                | $4.55 \times 10^{-4}$ | 7.66 K           |
| 63 Hz                          | $9.40 \times 10^{-5}$ | 8.59 K           | 355 Hz                | $5.59 \times 10^{-4}$ | 7.69 K           |
| 89 Hz                          | $1.74 \times 10^{-4}$ | 8.01 K           | 500 Hz                | $7.30 \times 10^{-4}$ | 7.57 K           |
| 125 Hz                         | $2.31 \times 10^{-4}$ | 8.02 K           | 707 Hz                | $8.53 \times 10^{-4}$ | 7.69 K           |
| 177 Hz                         | $3.47 \times 10^{-4}$ | 7.74 K           | 999 Hz                | $1.14 \times 10^{-3}$ | 7.45 K           |
| Mean value of $\tau_0$         |                       |                  | $4.67 \times 10^{-4}$ |                       |                  |
| Mean value of $U_{\text{eff}}$ |                       |                  | 7.9 K                 |                       |                  |

**Table S11.** Best fitted parameters obtained for the extended Debye model with ac susceptibility data from SQUID magnetometer of compound **2** in the 1500 Oe applied field.

|   | $T(K)$ | $\chi_s$ | $\chi_T$ | $\tau$ (s) | $\alpha$ | Residual   |
|---|--------|----------|----------|------------|----------|------------|
| 1 | 1.8    | 0.10519  | 0.709    | 5.41496E-4 | 0.22744  | 9.48617E-4 |
| 2 | 2.1    | 0.10789  | 0.65227  | 2.27528E-4 | 0.19111  | 6.51278E-4 |

|   |     |            |         |            |         |            |
|---|-----|------------|---------|------------|---------|------------|
| 3 | 2.4 | 0.00929    | 0.62469 | 6.30853E-5 | 0.25501 | 3.87345E-4 |
| 4 | 2.7 | 3.44032E-8 | 0.59006 | 2.46062E-5 | 0.25873 | 1.13373E-4 |
| 5 | 3.0 | 5.45275E-8 | 0.55544 | 8.97329E-6 | 0.29269 | 1.13031E-4 |
| 6 | 3.3 | 7.69405E-8 | 0.52566 | 3.19055E-6 | 0.33194 | 3.10198E-5 |

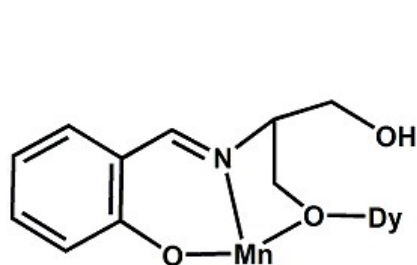

Coordination mode  $\eta^1, \eta^1, \eta^2: \mu_2$

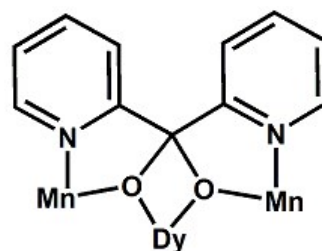

Coordination mode  $\eta^1, \eta^2, \eta^2, \eta^1: \mu_3$

**Scheme S1.** The coordination modes of  $(\text{py})_2\text{CO}_2^{2-}$  and  $(\text{py})_2\text{C}(\text{OH})\text{O}^-$  with metals for **1**.

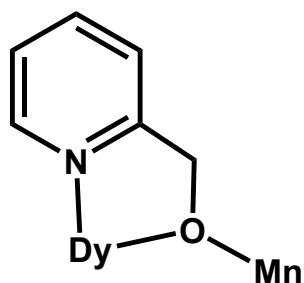

Coordination mode  $\eta^1, \eta^2, \mu_2$

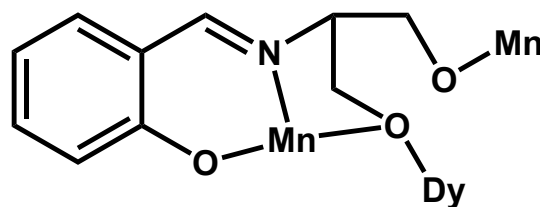

Coordination mode  $\eta^1, \eta^1, \eta^2, \eta^1, \mu_3$

**Scheme S2.** The coordination modes of  $\text{hmp}^-$  and  $\text{L}^{3-}$  with metals for **2**.

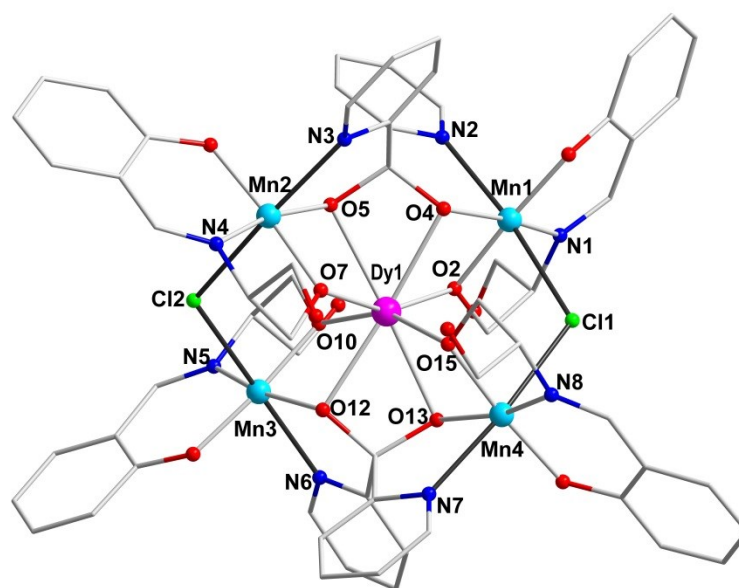

**Fig. S1** Crystal structure of **1**. For clarity, the H atoms and solvent molecules were omitted. The thick black lines represent the Jahn-Teller axes of  $\text{Mn}^{\text{III}}$  ions in **1**.

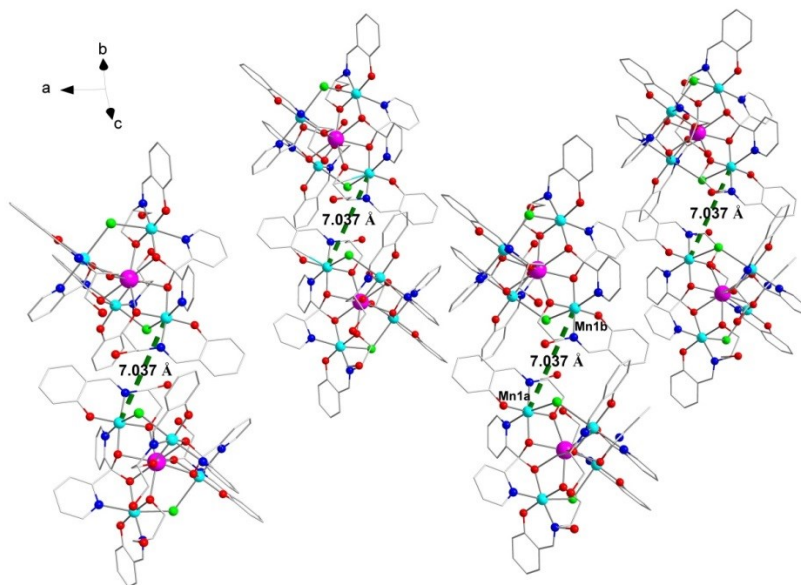

**Fig. S2** The plot showing the distances of the metal ions between molecules of **1**.

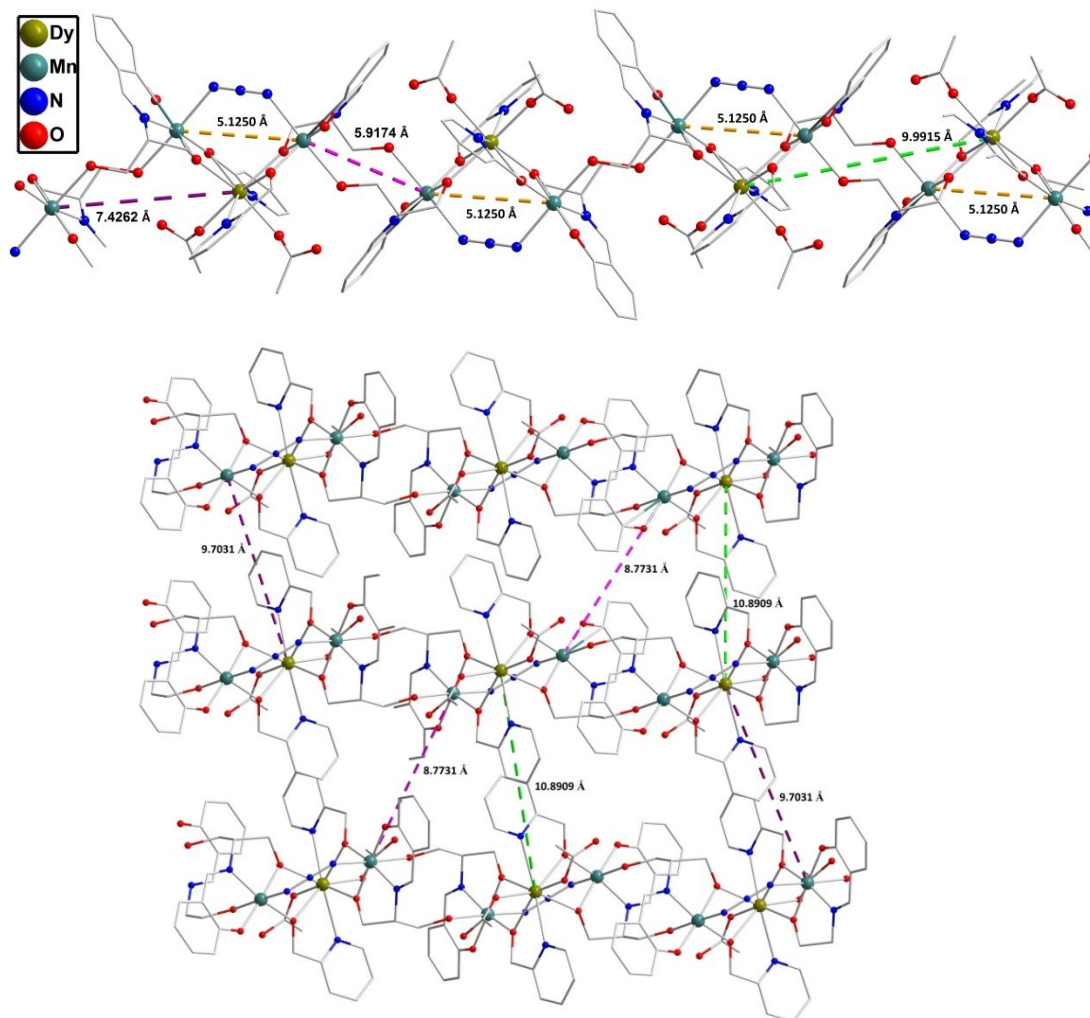

**Fig. S3** The plots showing the distances of metal ions in the 1D chain (top) and the distances of metal ions between 1D chain (bottom) of the complex **2**.



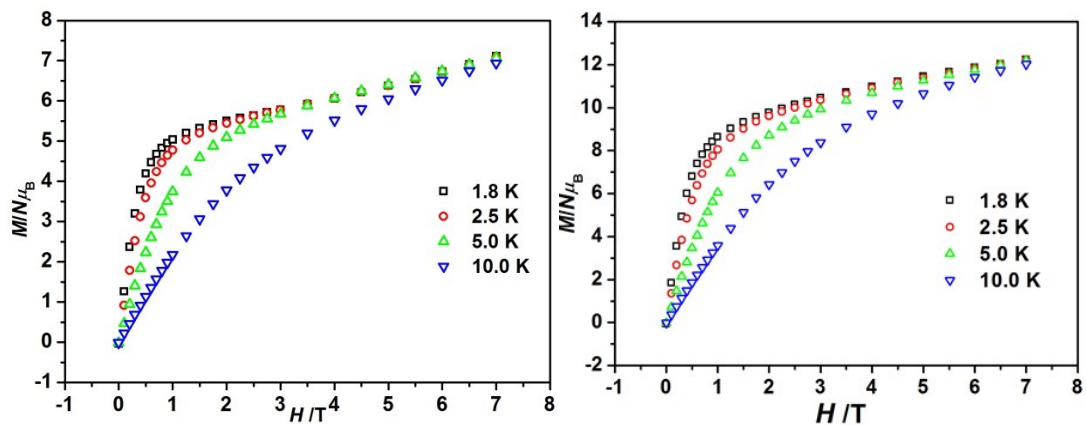

**Fig. S4** The plots of the field dependence of the magnetization for **1** (left) and **2** (right) at different temperatures.

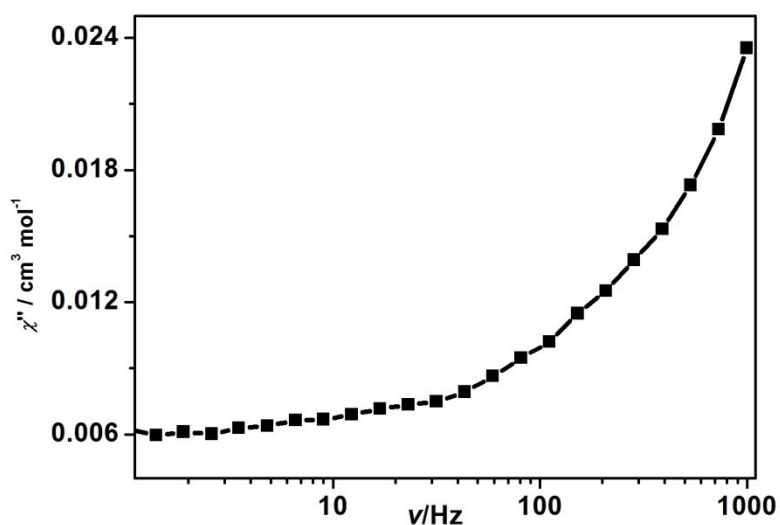

**Fig. S5** Plot of  $\chi''$  versus frequencies ( $\nu$ ) for **1** collected under a 0 Oe dc field with the temperature 2.0 K.

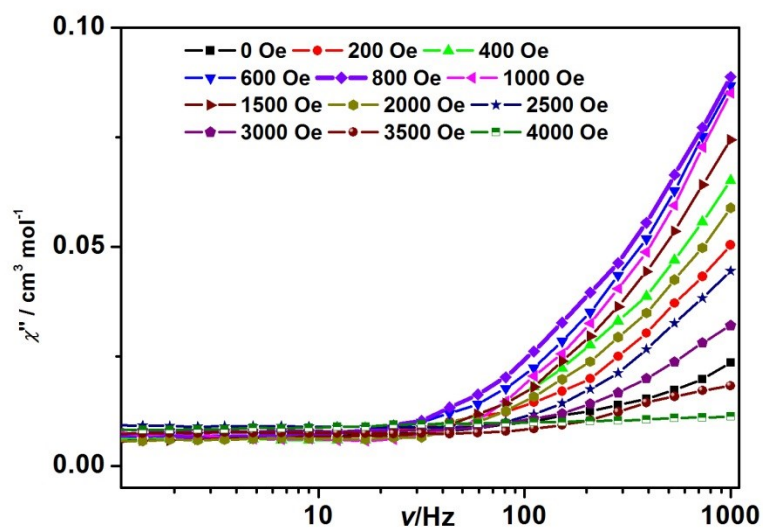

**Fig. S6** Plots of out-of-phase ( $\chi''$ ) versus frequencies ( $\nu$ ) for **1** at 2.0 K with the applied dc field shown in plots.

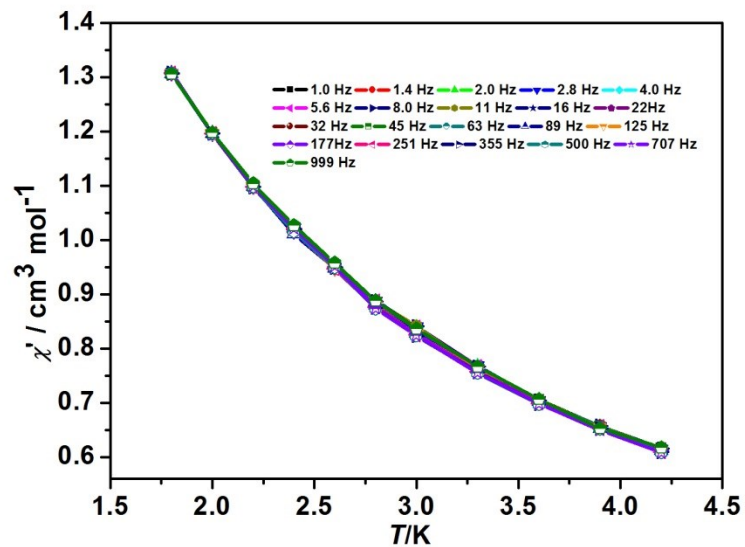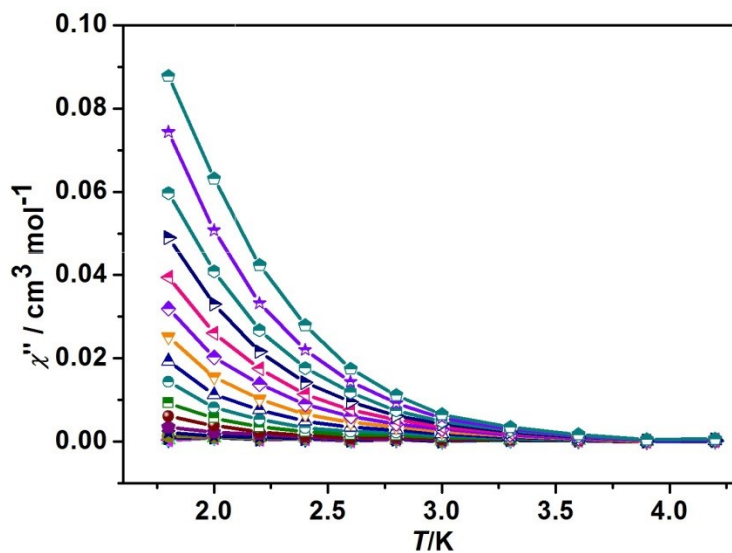

**Fig. S7** Plots of  $\chi'$  versus  $T$  (top) and  $\chi''$  versus temperatures ( $T$ ) (bottom) for **1** under a dc field of 800 Oe.

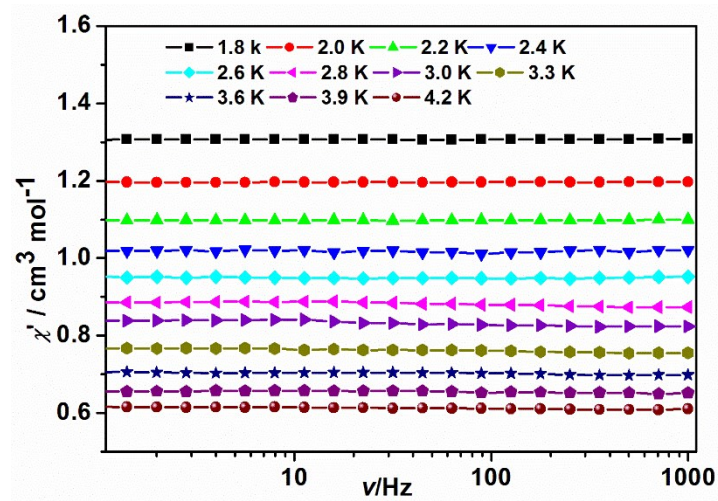

**Fig. S8** Plots of  $\chi'$  versus frequencies ( $\nu$ ) for **1** under a dc field of 800 Oe.

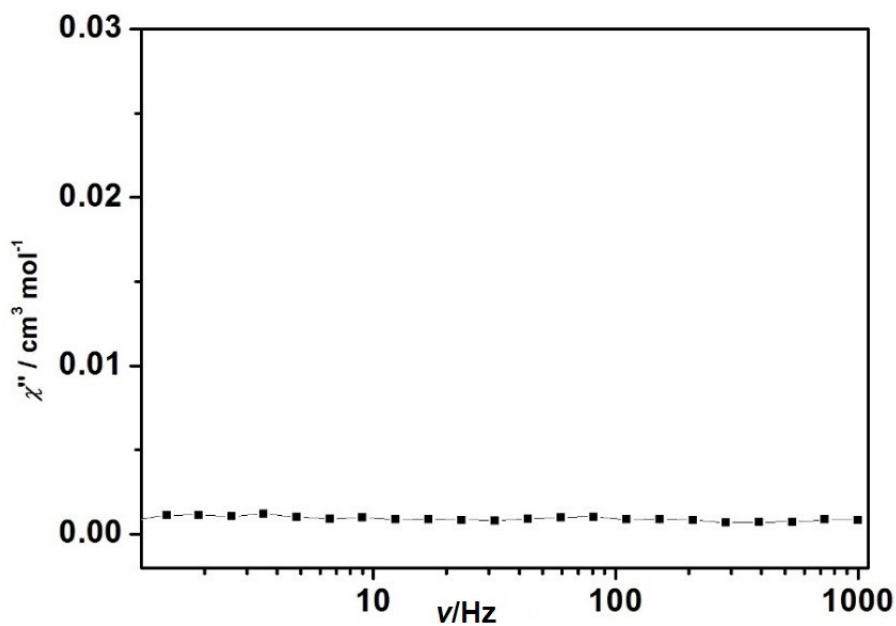

Fig. S9 Plot of  $\chi''$  versus frequencies ( $\nu$ ) for **2** at 2.0 K under a 0 Oe dc field.

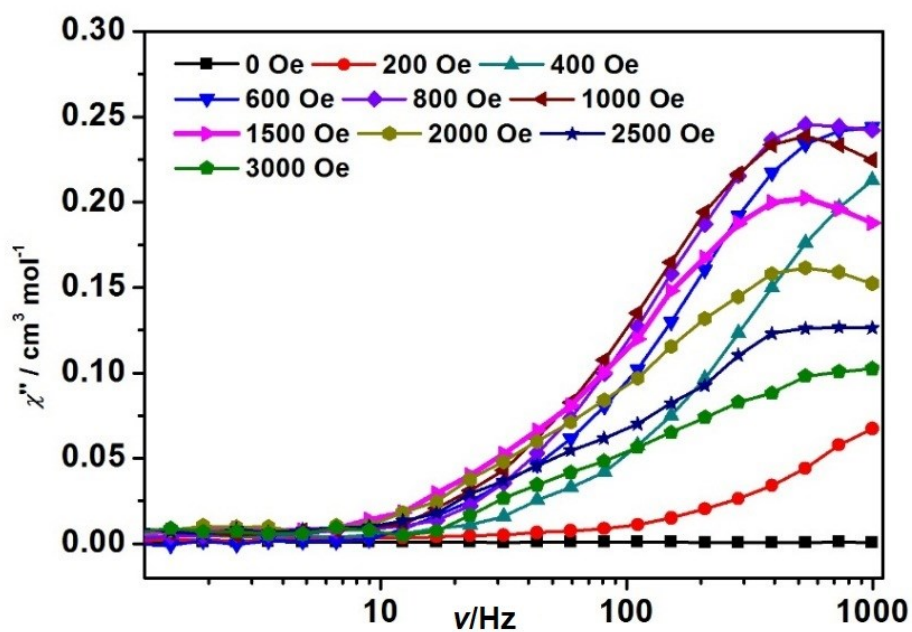

Fig. S10 Plots of  $\chi''$  versus frequencies ( $\nu$ ) for **2** at 2.0 K with the applied dc field shown in plots.

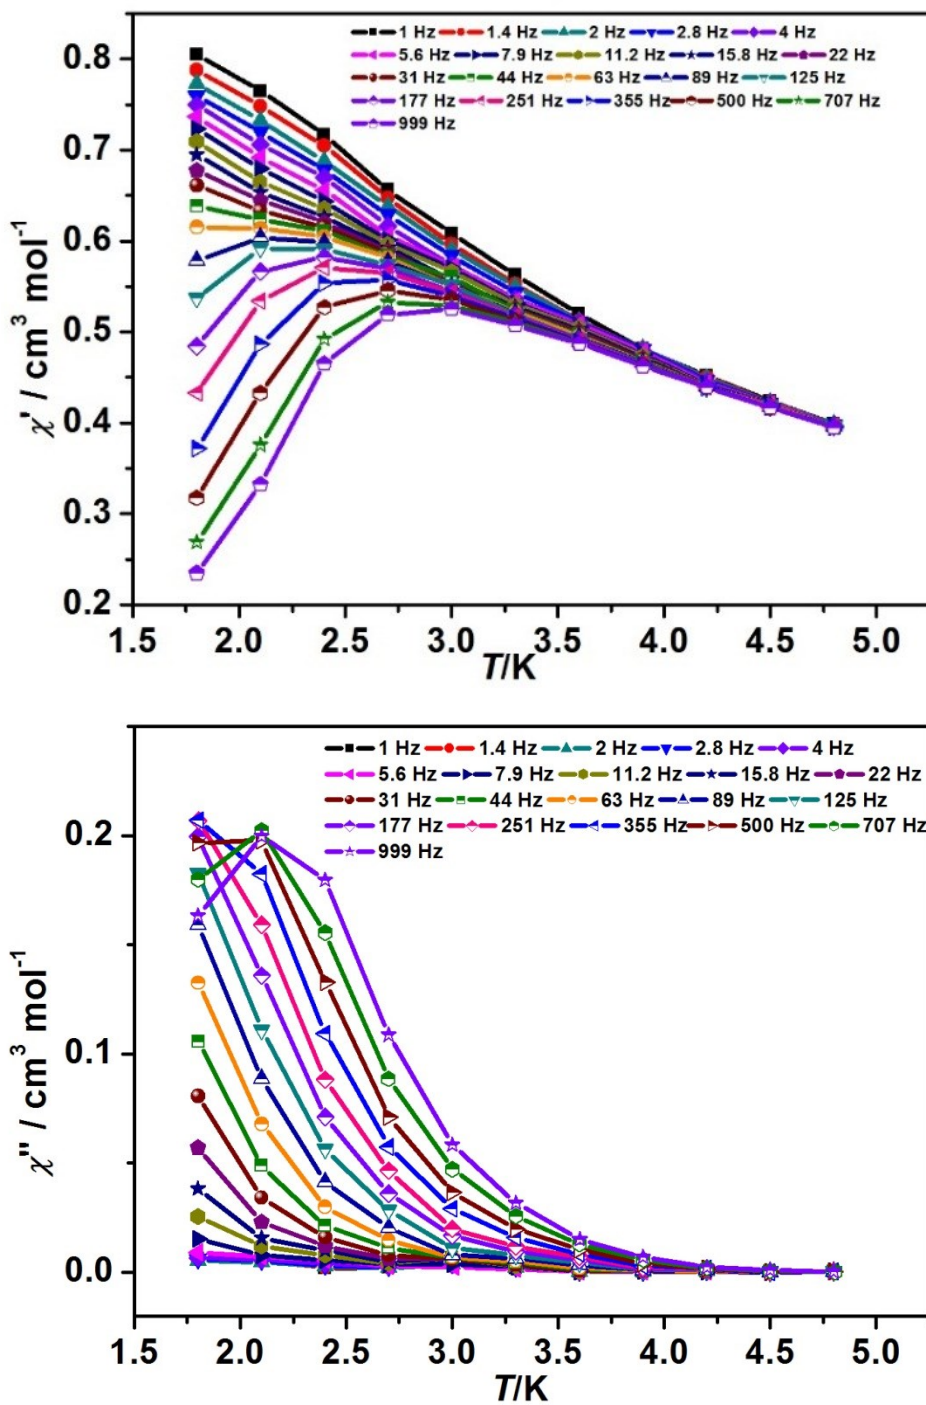

**Fig. S11** Plots of  $\chi'$  versus  $T$  (top) and  $\chi''$  versus temperatures ( $T$ ) (bottom) for **2** under a dc field of 1500 Oe.

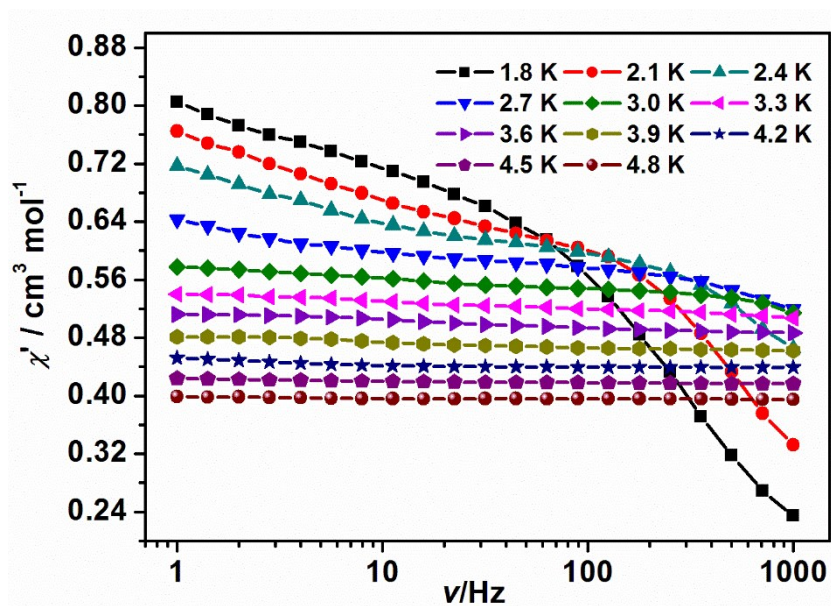

**Fig. S12** Plots of  $\chi'$  versus frequencies ( $\nu$ ) for **2** under a dc field of 1500 Oe.

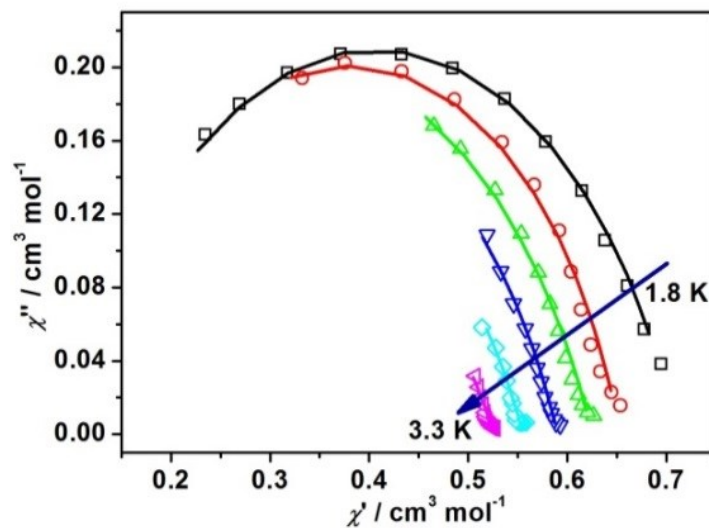

**Fig. S13** Cole-Cole plots for complex **2** under 1500 Oe dc field. Solid lines show the fit of the data by employing the generalized single relaxation process Debye model.
